# Supplementary material for: Exploring women’s interpretations of survey questions on pregnancy and pregnancy outcomes: cognitive interviews in Iganga Mayuge, Uganda
Source: Springer Nature journal article supplement (doi:10.1186/s12978-024-01745-w), 2024-01-29
Supplement: MOESM1 [file 26672450]

**Additional file 1: Cognitive interview questionnaire: Adapted reproduction section of woman’s questionnaire – DHS VIII, English**

Interviewer name \_\_\_\_\_ Respondent ID \_\_\_\_\_ Interview date: \_\_\_ / \_\_\_ / \_\_\_

(DD/MM/YY)

Time interview started: :

**Section A – interview questions from DHS**

| Original question                                                                                                                        | Response categories                                                   | Probes (Pre-set & by interviewer)                                                                                                                                                          | Respondent’s answer after probe | Interviewer’s comment (on verbal & non-verbal behavior) | Suggested revision |
|------------------------------------------------------------------------------------------------------------------------------------------|-----------------------------------------------------------------------|--------------------------------------------------------------------------------------------------------------------------------------------------------------------------------------------|---------------------------------|---------------------------------------------------------|--------------------|
| 201. Now I would like to ask about all the births you have had during your life. Have you ever given birth?                              | Yes<br><br>No ( <i>If no, skip to 206</i> )                           | <ul style="list-style-type: none"> <li>Can you repeat the question in your own words?</li> <li><i>Any other probe by interviewer</i></li> </ul>                                            |                                 |                                                         |                    |
| 202. Do you have any sons or daughters to whom you have given birth who are now living with you?                                         | Yes<br><br>No ( <i>If no, skip to 204</i> )                           | <ul style="list-style-type: none"> <li>What does this question mean to you?</li> <li><i>Any other probe by interviewer</i></li> </ul>                                                      |                                 |                                                         |                    |
| 204. Do you have any sons or daughters to whom you have given birth who are alive but do not live with you?                              | Yes<br><br>No ( <i>If no, skip to 206</i> )                           | <ul style="list-style-type: none"> <li>What does this question mean to you?</li> <li><i>Any other probe by interviewer</i></li> </ul>                                                      |                                 |                                                         |                    |
| 206. Have you ever given birth to a boy or girl who was born alive but later died?<br><br>IF NO, PROBE: Any baby who cried, who made any | Yes<br><br>No ( <i>If no, skip to 209 to calculate total births</i> ) | <ul style="list-style-type: none"> <li>Can you repeat the question in your own words?</li> <li>How easy or difficult did you find this question to answer? Why do you say that?</li> </ul> |                                 |                                                         |                    |

|                                                                                                                                                                                                                                                   |                                                      |                                                                                                                                                                                                                                                                                                                                     |  |  |  |
|---------------------------------------------------------------------------------------------------------------------------------------------------------------------------------------------------------------------------------------------------|------------------------------------------------------|-------------------------------------------------------------------------------------------------------------------------------------------------------------------------------------------------------------------------------------------------------------------------------------------------------------------------------------|--|--|--|
| <p>movement, sound, or effort to breathe, or who showed any other signs of life even if for a very short time?</p>                                                                                                                                |                                                      | <ul style="list-style-type: none"> <li>• <i>Any other probe by interviewer</i><br/>(e.g. I noticed you hesitated before you answered – what were you thinking about?)</li> </ul>                                                                                                                                                    |  |  |  |
| <p>207.<br/>a) How many boys have died?<br/>b) And how many girls have died?<br/><br/>IF NONE, RECORD '00'.</p>                                                                                                                                   | <p>a) Boys dead.....<br/><br/>b) Girls dead.....</p> | <ul style="list-style-type: none"> <li>• How easy or difficult did you find this question to answer? Why do you say that?</li> <li>• Were you comfortable answering this question? Why or why not?</li> <li>• <i>Any other probe by interviewer</i></li> </ul>                                                                      |  |  |  |
| <p>209. Just to make sure that I have this right: you have had in TOTAL _____ births during your life. Is that correct?</p>                                                                                                                       |                                                      |                                                                                                                                                                                                                                                                                                                                     |  |  |  |
| <p>210. Women sometimes have a pregnancy that does not result in a live birth. For example, a pregnancy can end in a miscarriage, an abortion, or the child can be born dead. Have you ever had a pregnancy that did not end in a live birth?</p> | <p>Yes<br/><br/>No (<i>If no, skip to 214</i>)</p>   | <ul style="list-style-type: none"> <li>• Can you repeat the question in your own words?</li> <li>• What does miscarriage mean to you?</li> <li>• What does abortion mean to you?</li> <li>• What does it mean to you when I say a child can be born dead?</li> <li>• How easy or difficult did you find this question to</li> </ul> |  |  |  |

|                                                                                                                                                           |                                                                       |                                                                                                                                                                                                                                                                                                                          |  |  |  |
|-----------------------------------------------------------------------------------------------------------------------------------------------------------|-----------------------------------------------------------------------|--------------------------------------------------------------------------------------------------------------------------------------------------------------------------------------------------------------------------------------------------------------------------------------------------------------------------|--|--|--|
|                                                                                                                                                           |                                                                       | <p>answer? Why do you say that?</p> <ul style="list-style-type: none"> <li>• <i>Any other probe by interviewer</i></li> </ul>                                                                                                                                                                                            |  |  |  |
| 211. How many miscarriages, abortions, and stillbirths have you had?                                                                                      | Pregnancy losses.....                                                 | <ul style="list-style-type: none"> <li>• Can you repeat the question in your own words?</li> <li>• How easy or difficult did you find this question to answer? Why do you say that?</li> <li>• Were you comfortable answering this question? Why or why not?</li> <li>• <i>Any other probe by interviewer</i></li> </ul> |  |  |  |
| 214. Now I would like to record all your pregnancies including live births, stillbirths, miscarriages, and abortions, starting with your first pregnancy. |                                                                       | <ul style="list-style-type: none"> <li>• What does this question mean to you?</li> <li>• Was this hard or easy? Why do you say so?</li> <li>• <i>Any other probe by interviewer</i></li> </ul> <p>(e.g. I noticed you hesitated before you answered – what were you thinking about?)</p>                                 |  |  |  |
| 232. Are you pregnant now?                                                                                                                                | <p>Yes<br/>No<br/>Unsure<br/>(If No or Unsure, end the interview)</p> | <ul style="list-style-type: none"> <li>• How sure of your answer are you?</li> <li>• How easy or difficult did you find this question to answer? Why do you say that?</li> </ul>                                                                                                                                         |  |  |  |

|                                                 |                           |                                                                                                                                                                                                                                                                                                                            |  |  |  |
|-------------------------------------------------|---------------------------|----------------------------------------------------------------------------------------------------------------------------------------------------------------------------------------------------------------------------------------------------------------------------------------------------------------------------|--|--|--|
|                                                 |                           | <ul style="list-style-type: none"> <li>• Were you comfortable answering this question? Why or why not?</li> <li>• How would you say that question yourself?</li> <li>• <i>Any other probe by interviewer</i><br/>(e.g. I noticed you hesitated before you answered – what were you thinking about?)</li> </ul>             |  |  |  |
| 233. How many weeks or months pregnant are you? | Weeks.....<br>Months..... | <ul style="list-style-type: none"> <li>• How sure of your answer are you?</li> <li>• How did you arrive at that answer?</li> <li>• Was it easy or difficult to answer this question? Why do you say that?</li> <li>• How would you say that question yourself?</li> <li>• <i>Any other probe by interviewer</i></li> </ul> |  |  |  |

*Thank subject for her time and end the interview*

Time interview ended :   :

**B. Other areas for the interviewer to fill in after interview**

Please describe any other problems you observed during the interview

- Where respondent had difficulty answering a question
- Were they hesitant over some questions?
